# Supplementary material for: Absence of NLRP3 Inflammasome in Hematopoietic Cells Reduces Adverse Remodeling After Experimental Myocardial Infarction
Source: PubMed Central journal article supplement — JACC Basic Transl Sci. 2020 Dec 9;5(12):1210–24. doi: 10.1016/j.jacbts.2020.09.013 (PMC7775960; doi:10.1016/j.jacbts.2020.09.013), 2020-12-09
Supplement: mmc1.pdf [file mmc1.pdf]

SUPPLEMENTAL MATERIAL

**Supplemental Figure S1. Confirmation of bone marrow engraftment.** Representative flow plots showing the percentage of engraftment for CD45.1 and CD45.2 leukocytes, two months after bone marrow transplantation in irradiated mice.

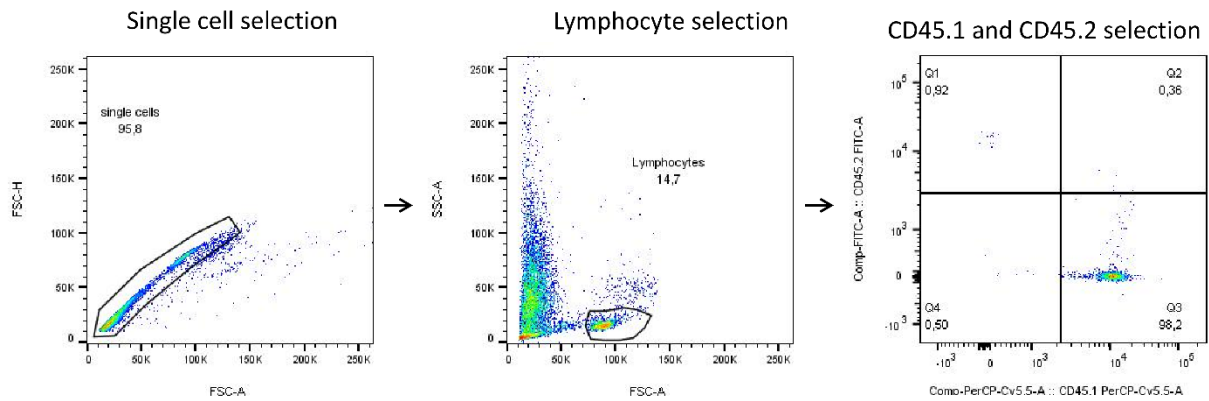

**Supplemental Figure S2. Apoptosis induction in Jurkat T cells with 0.1  $\mu$ M camptothecin.**

Representative flow plots showing Jurkat T-cells before (left panel) and after 16 hours of 0.1  $\mu$ M camptothecin treatment (right panel) using Viability and Annexin A5 markers.

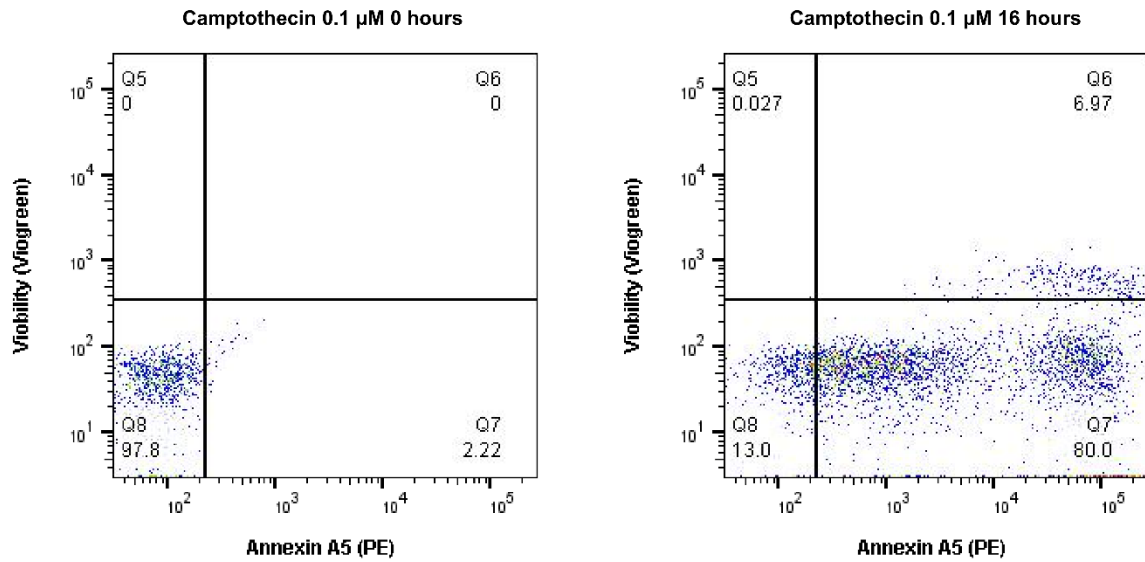

**Supplemental Figure S3. End-diastolic and end-systolic volume 1 day post-MI.** (A) End-diastolic and (B) end-systolic volumes measured normalized for body weight in male mice 1 day post-MI as measured by MRI. n = 17-18 mice per genotype. Data are presented as mean  $\pm$  SEM.

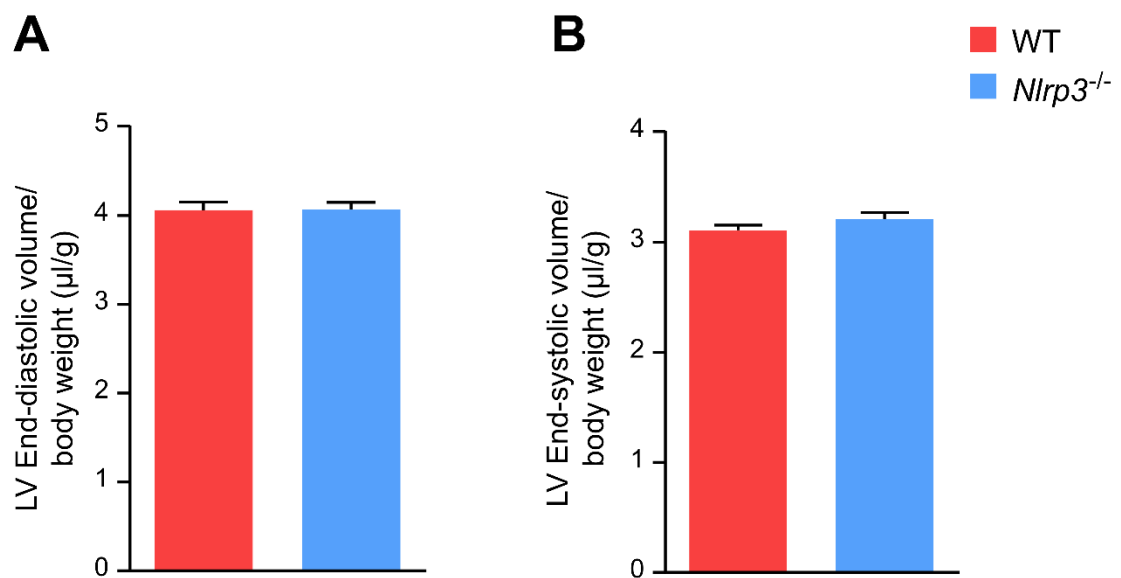

**Supplemental Figure S4. Infarct size and cardiac function changes during 21 days post-MI**

**period.** (A) Myocardial infarct size, (B) ejection fraction, (C) end-diastolic volume and (D) end-systolic volume in WT and *Nlrp3*<sup>-/-</sup> female mice measured by MRI and normalized for body weight 1, 7 and 21 days post-MI. n= 7-13 mice per group. To avoid underrepresentation of the data, due to drop out of mice during the time course of the study, t-tests are used instead of a repeated measures ANOVA. Data are presented as mean ± SEM. \*p<0.05, \*\*p<0.01.

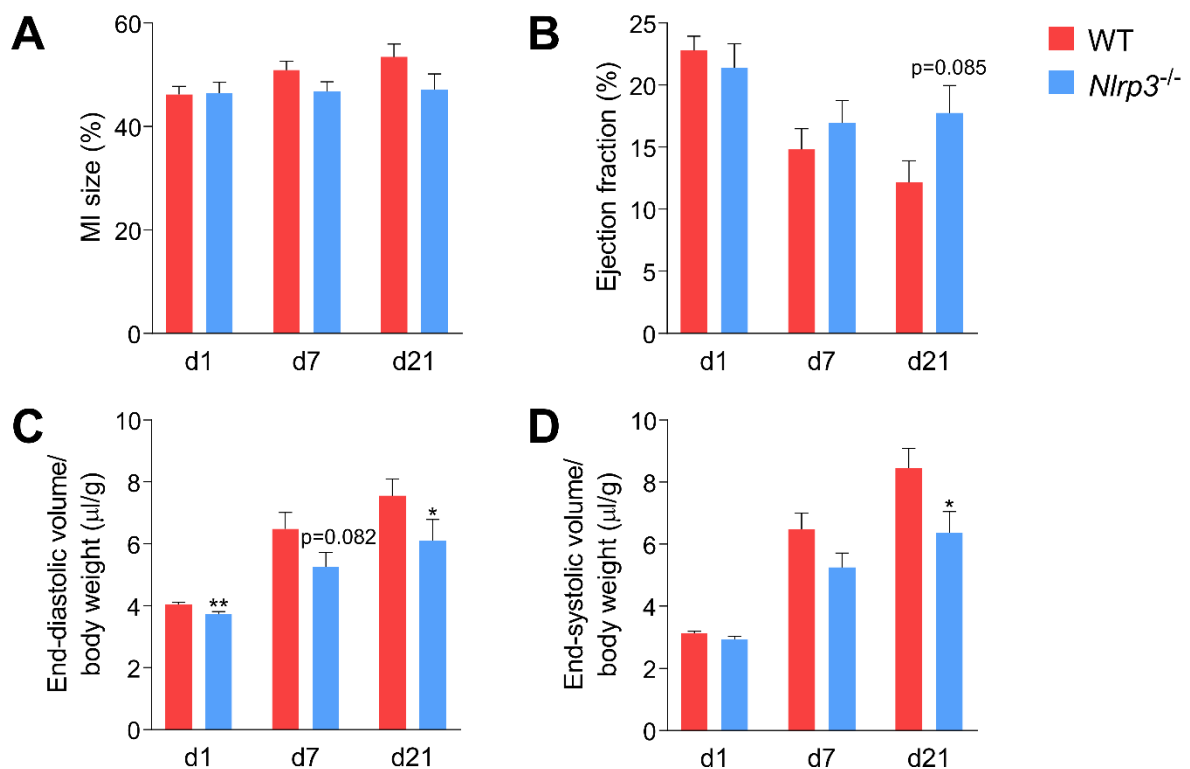

**Supplemental Figure S5. *Nlrp3*<sup>-/-</sup> mice have altered myocardial levels of neutrophils 3 days post-MI.** Percentage of Ly6G (A and B) and Mac2 (C and D) positive cells per indicated area of the left ventricle in WT and *Nlrp3*<sup>-/-</sup> mice 1 and 3 days post-MI. Representative cross sections for Ly6G and Mac2 staining (scale bars are 200  $\mu$ M) are shown next to the corresponding bar graph (Sham; n=3, Viable LV and MI; Ly6G; Day 1 post MI; n=12 WT, n=13 *Nlrp3*<sup>-/-</sup>. Day 3 post MI; n=8 WT, n=7 *Nlrp3*<sup>-/-</sup>. Mac2; Day 1 post MI; n=11 WT, n=15 *Nlrp3*<sup>-/-</sup>, Day 3 post MI; n=9 WT, n=6 *Nlrp3*<sup>-/-</sup>). Data are presented as mean  $\pm$  SEM. \*p< 0.05

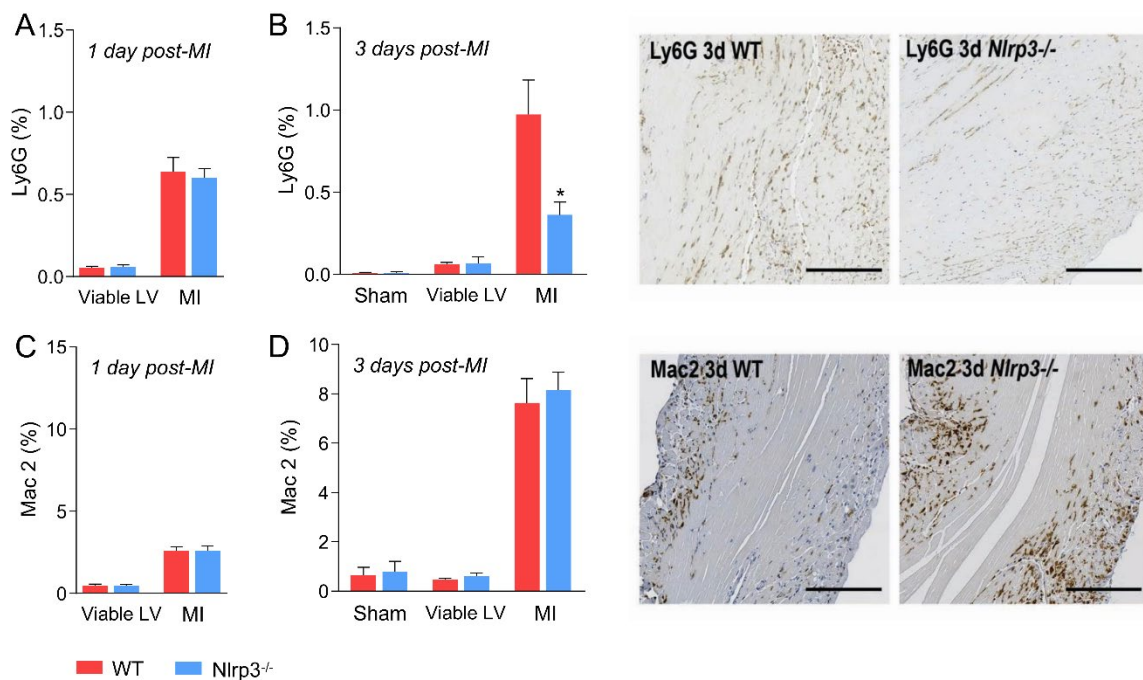

### ABBREVIATIONS IN FIGURE 3

Afp = alpha fetoprotein

Ahsg = alpha-2-HS-glycoprotein

Alb = albumin

Apoh = apolipoprotein H

Cd109 = CD109 antigen

Cd40 = CD40 antigen

Col6a5 = collagen, type VI, alpha 5

Cx3cl1 = chemokine (C-X3-C motif) ligand 1

Ecm1 = extracellular matrix protein 1

Egfr = epidermal growth factor receptor

Egl1 = egl-9 family hypoxia-inducible factor 1

Emilin1 = elastin microfibril interfacer 1

Emilin2 = elastin microfibril interfacer 2

F10 = coagulation factor X

F11r = F11 receptor

F12 = coagulation factor XII (Hageman factor)

F9 = coagulation factor IX

Fbln2 = fibulin 2

Fbln5 = fibulin 5

Fbn1 = fibrillin 1

Fgb = fibrinogen beta chain

Fos = FBJ osteosarcoma oncogene

Fstl1 = follistatin-like 1

Gp1bb = glycoprotein Ib, beta polypeptide

Grn = granulin

Hgs = HGF-regulated tyrosine kinase substrate

Igfbp4 = insulin-like growth factor binding protein 4

Igfbp5 = insulin-like growth factor binding protein 5

Igfbp6 = insulin-like growth factor binding protein 6

Igfbp7 = insulin-like growth factor binding protein 7

Lamb1 = laminin B1

Lamp1 = lysosomal-associated membrane protein 1

Lamp2 = lysosomal-associated membrane protein 2

Ltbp2 = latent transforming growth factor beta binding protein 2

M6pr = mannose-6-phosphate receptor, cation dependent

Mfap5 = microfibrillar associated protein 5

Pdcl3 = phosphatidylcholine transferase-like 3

Plg = plasminogen

Proz = protein Z, vitamin K-dependent plasma glycoprotein

Psap = prosaposin

Pxdn = peroxidase

Pxn = paxillin

Sash1 = SAM and SH3 domain containing 1

Selenop = selenoprotein P

Sparc = secreted acidic cysteine rich glycoprotein

Sparcl1 = SPARC-like 1

Tgfb1i1 = transforming growth factor beta 1 induced transcript 1

Thbd = thrombomodulin

Timp1 = tissue inhibitor of metalloproteinase 1

Tnc = tenascin C

Twsg1 = twisted gastrulation BMP signaling modulator 1

Vegfa = vascular endothelial growth factor A

Vwf = Von Willebrand factor
